# Supplementary material for: Phenolics extracted from tartary (Fagopyrum tartaricum L. Gaerth) buckwheat bran exhibit antioxidant activity, and an antiproliferative effect on human breast cancer MDA-MB-231 cells through the p38/MAP kinase pathway
Source: Royal Society of Chemistry journal article supplement (doi:10.1039/c6fo01230b), 2016-11-28
Supplement: c6fo01230b4.pdf [file c6fo01230b4.pdf]

One of the three independently performed experiments was taken as the example:

**Table2** The original data for the calculation of content of individual detected phenolic compound.

| Peak | Phenolic compounds            | Peak area |         | Regression equations, $R^2$   | Concentration ( $\mu\text{g/mL}$ ) <b>a</b> |        | Content ( $\mu\text{g}/100\text{ mg DW}$ ) <b>b</b> |       |
|------|-------------------------------|-----------|---------|-------------------------------|---------------------------------------------|--------|-----------------------------------------------------|-------|
|      |                               | Free      | Bound   |                               | Free                                        | Bound  | Free                                                | Bound |
| 1    | <i>p</i> -hydroxybenzoic acid | 429806    | 882981  | $y=161886x-29447, R^2=0.9998$ | 2.837                                       | 5.636  | 7.09                                                | 14.09 |
| 3    | vanillic acid                 | 750840    | nc      | $y=117274x+58743, R^2=0.9997$ | 5.902                                       | nc     | 14.76                                               | nc    |
| 4    | caffeic acid                  | 3079029   | 618172  | $y=66215x-92574, R^2=0.9963$  | 47.899                                      | 10.734 | 119.75                                              | 26.84 |
| 5    | ferulic acid                  | nc        | 1426223 | $y=135104x-26427, R^2=0.9991$ | nc                                          | 10.752 | nc                                                  | 26.88 |
| 2    | catechin                      | 587836    | nc      | $y=145677x-11855, R^2=0.9999$ | 4.117                                       | nc     | 10.29                                               | nc    |
| 6    | rutin                         | 986476    | 1365298 | $y=67925x-38416, R^2=0.9949$  | 15.089                                      | 20.666 | 37.72                                               | 51.67 |
| 7    | resveratrol                   | 1747645   | nc      | $y=157070x-37540, R^2=0.9968$ | 11.366                                      | nc     | 28.42                                               | nc    |
| 8    | quercetin                     | 797173    | 737840  | $y=221031x+61469, R^2=0.9981$ | 3.329                                       | 3.062  | 8.32                                                | 7.66  |

**a** The concentration of the phenolic compound was calculated from its regression equation, in which ‘y’ is the peak area and ‘x’ is the calculated concentration ( $\mu\text{g/mL}$ ).

**b** The content of each detected phenolic compound was calculated from the formula (1):

$$\text{Content } (\mu\text{g}/100\text{ mg DW}) = c \times v/m \quad (1)$$

where: *c* is the concentration ( $\mu\text{g/mL}$ ) of phenolic compound calculated from its regression equation based on its peak area; *v* is the volume (mL) of free or bound phenolic extract; *m* is the dry weight (g) of tartary buckwheat bran used for phenolics extraction.
